# Supplementary material for: Rapid antibiotic susceptibility testing from blood culture bottles with species agnostic real-time polymerase chain reaction
Source: PubMed Central journal article supplement (PMC6292663; doi:10.1371/journal.pone.0209042), 2018-12-13
Supplement: pone.0209042.s001.pdf [file pone.0209042.s001.pdf]

**Table A. Enterobacteriaceae spp. strain information.**

| Species                       | Strain | Origin | Ciprofloxacin   |                           |                   | Gentamicin      |                           |                   | Imipenem        |                           |                   |
|-------------------------------|--------|--------|-----------------|---------------------------|-------------------|-----------------|---------------------------|-------------------|-----------------|---------------------------|-------------------|
|                               |        |        | BMD (MIC; int*) | qPCR assay ( $\Delta$ Cq) | qPCR assay (int*) | BMD (MIC; int*) | qPCR assay ( $\Delta$ Cq) | qPCR assay (int*) | BMD (MIC; int*) | qPCR assay ( $\Delta$ Cq) | qPCR assay (int*) |
| <i>Escherichia coli</i>       | AR0001 | CDC    | > 32; R         | 0.2                       | R                 | 2; S            | 3.1                       | S                 | 4; R            | -0.5                      | R                 |
| <i>Enterobacter cloacae</i>   | AR0002 | CDC    | 16; R           | -0.4                      | R                 | 8; I            | 3.4                       | S                 | 32; R           | 0.2                       | R                 |
| <i>Klebsiella pneumoniae</i>  | AR0003 | CDC    | 16; R           | 0.0                       | R                 | 4; S            | 3.3                       | S                 | 8; R            | 0.1                       | R                 |
| <i>Klebsiella pneumoniae</i>  | AR0004 | CDC    | 16; R           | -0.6                      | R                 | 1; S            | 3.9                       | S                 | 32; R           | -0.4                      | R                 |
| <i>Klebsiella pneumoniae</i>  | AR0005 | CDC    | 32; R           | 0.2                       | R                 | 2; S            | 2.7                       | S                 | 16; R           | -0.8                      | R                 |
| <i>Escherichia coli</i>       | AR0006 | CDC    | > 32; R         | -0.3                      | R                 | > 64; R         | -0.3                      | R                 | 8; R            | 0.3                       | R                 |
| <i>Enterobacter aerogenes</i> | AR0007 | CDC    | 32; R           | -0.3                      | R                 | 1; S            | 6.1                       | S                 | 0.5; S          | 7.7                       | S                 |
| <i>Enterobacter cloacae</i>   | AR0008 | CDC    | 16; R           | 0.1                       | R                 | ≤ 0.5; S        | 4.5                       | S                 | 1; S            | 5.9                       | S                 |
| <i>Enterobacter aerogenes</i> | AR0009 | CDC    | ≤ 0.25; S       | 3.4                       | S                 | 1; S            | 4.6                       | S                 | 4; R            | 0.8                       | R                 |
| <i>Klebsiella pneumoniae</i>  | AR0010 | CDC    | ≤ 0.25; S       | 2.3                       | S                 | 4; S            | 3.2                       | S                 | 1; S            | 5.4                       | S                 |
| <i>Escherichia coli</i>       | AR0011 | CDC    | > 32; R         | 0.2                       | R                 | 64; R           | -0.2                      | R                 | ≤ 0.25; S       | 6.8                       | S                 |
| <i>Klebsiella pneumoniae</i>  | AR0012 | CDC    | 16; R           | 0.1                       | R                 | 32; R           | 2.2                       | R                 | ≤ 0.25; S       | 6.4                       | S                 |
| <i>Escherichia coli</i>       | AR0013 | CDC    | ≤ 0.25; S       | 3.6                       | S                 | > 64; R         | -0.3                      | R                 | ≤ 0.25; S       | 7.2                       | S                 |
| <i>Escherichia coli</i>       | AR0014 | CDC    | 32; R           | -0.4                      | R                 | 64; R           | -0.1                      | R                 | ≤ 0.25; S       | 6.1                       | S                 |
| <i>Escherichia coli</i>       | AR0015 | CDC    | > 32; R         | -0.1                      | R                 | > 64; R         | 0.9                       | R                 | ≤ 0.25; S       | 6.9                       | S                 |
| <i>Klebsiella pneumoniae</i>  | AR0016 | CDC    | ≤ 0.25; S       | 2.7                       | S                 | ≤ 0.5; S        | 6.1                       | S                 | ≤ 0.25; S       | 7.7                       | S                 |
| <i>Escherichia coli</i>       | AR0017 | CDC    | ≤ 0.25; S       | 3.1                       | S                 | 1; S            | 1.7                       | R                 | 1; S            | 3.7                       | S                 |
| <i>Enterobacter aerogenes</i> | AR0018 | CDC    | ≤ 0.25; S       | 4.4                       | S                 | 1; S            | 5.8                       | S                 | 1; S            | 6.3                       | S                 |
| <i>Escherichia coli</i>       | AR0019 | CDC    | > 32; R         | -0.2                      | R                 | ≤ 0.5; S        | 3.9                       | S                 | ≤ 0.25; S       | 6.2                       | S                 |
| <i>Escherichia coli</i>       | AR0020 | CDC    | 16; R           | -0.3                      | R                 | 1; S            | 6.0                       | S                 | 1; S            | 7.2                       | S                 |
| <i>Citrobacter freundii</i>   | AR0021 | CDC    | ≤ 0.25; S       | 2.6                       | S                 | 1; S            | 5.3                       | S                 | 1; S            | 6.5                       | S                 |
| <i>Citrobacter freundii</i>   | AR0022 | CDC    | ≤ 0.25; S       | 3.5                       | S                 | ≤ 0.5; S        | 4.6                       | S                 | 1; S            | 5.4                       | S                 |
| <i>Citrobacter freundii</i>   | AR0023 | CDC    | ≤ 0.25; S       | 2.6                       | S                 | ≤ 0.5; S        | 5.3                       | S                 | 1; S            | 6.2                       | S                 |
| <i>Citrobacter koseri</i>     | AR0024 | CDC    | ≤ 0.25; S       | 3.2                       | S                 | 1; S            | 5.2                       | S                 | ≤ 0.25; S       | 7.0                       | S                 |
| <i>Citrobacter koseri</i>     | AR0025 | CDC    | ≤ 0.25; S       | 4.5                       | S                 | 64; R           | 0.7                       | R                 | ≤ 0.25; S       | 7.2                       | S                 |
| <i>Providencia stuartii</i>   | AR0026 | CDC    | ≤ 0.25; S       | 3.4                       | S                 | 1; S            | 3.9                       | S                 | 0.5; S          | -1.2                      | R                 |
| <i>Serratia marcescens</i>    | AR0027 | CDC    | ≤ 0.25; S       | 0.9                       | R                 | ≤ 0.5; S        | 3.4                       | S                 | 4; R            | -0.4                      | R                 |
| <i>Klebsiella oxytoca</i>     | AR0028 | CDC    | ≤ 0.25; S       | 3.5                       | S                 | ≤ 0.5; S        | 4.6                       | S                 | ≤ 0.25; S       | 7.2                       | S                 |
| <i>Proteus mirabilis</i>      | AR0029 | CDC    | ≤ 0.25; S       | 4.2                       | S                 | 1; S            | 3.7                       | S                 | 8; R            | -0.4                      | R                 |
| <i>Shigella sonnei</i>        | AR0030 | CDC    | ≤ 0.25; S       | 4.1                       | S                 | 1; S            | 4.6                       | S                 | ≤ 0.25; S       | 6.8                       | S                 |
| <i>Salmonella typhimurium</i> | AR0031 | CDC    | ≤ 0.25; S       | 3.1                       | S                 | 1; S            | 3.8                       | S                 | ≤ 0.25; S       | 4.8                       | S                 |
| <i>Klebsiella pneumoniae</i>  | AR0112 | CDC    | 32; R           | -0.3                      | R                 | 16; R           | -0.1                      | R                 | 4; R            | 0.0                       | R                 |
| <i>Klebsiella pneumoniae</i>  | AR0113 | CDC    | > 32; R         | 0.1                       | R                 | >64; R          | -0.3                      | R                 | 16; R           | -0.3                      | R                 |
| <i>Escherichia coli</i>       | AR0114 | CDC    | 16; R           | -0.1                      | R                 | 4; S            | 3.0                       | S                 | > 32; R         | 0.3                       | R                 |
| <i>Klebsiella pneumoniae</i>  | AR0115 | CDC    | 32; R           | 0.1                       | R                 | 8; I            | 1.3                       | R                 | > 32; R         | -0.1                      | R                 |
| <i>Citrobacter freundii</i>   | AR0116 | CDC    | 8; R            | 0.4                       | R                 | 16; R           | 0.5                       | R                 | 8; R            | 0.6                       | R                 |
| <i>Klebsiella pneumoniae</i>  | AR0117 | CDC    | 4; R            | -0.2                      | R                 | 16; R           | 0.3                       | R                 | 16; R           | 0.5                       | R                 |

|                               |        |     |           |      |   |          |      |   |         |      |   |
|-------------------------------|--------|-----|-----------|------|---|----------|------|---|---------|------|---|
| <i>Escherichia coli</i>       | AR0118 | CDC | 32; R     | 0.6  | R | > 64; R  | -0.6 | R | 1; S    | 6.5  | S |
| <i>Escherichia coli</i>       | AR0119 | CDC | > 32; R   | -0.4 | R | > 64; R  | -0.1 | R | 0.5; S  | 6.0  | S |
| <i>Klebsiella pneumoniae</i>  | AR0120 | CDC | 32; R     | -0.6 | R | 64; R    | 0.1  | R | 16; R   | 0.8  | R |
| <i>Serratia marcescens</i>    | AR0121 | CDC | 1; S      | 2.9  | S | ≤ 0.5; S | 3.9  | S | > 32; R | 0.2  | R |
| <i>Serratia marcescens</i>    | AR0122 | CDC | ≤ 0.25; S | 4.0  | S | ≤ 0.5; S | 5.6  | S | > 32; R | 0.2  | R |
| <i>Serratia marcescens</i>    | AR0123 | CDC | ≤ 0.25; S | 2.7  | S | ≤ 0.5; S | 5.5  | S | > 32; R | 1.2  | R |
| <i>Serratia marcescens</i>    | AR0124 | CDC | ≤ 0.25; S | 2.4  | S | 1; S     | 3.8  | S | > 32; R | 0.8  | R |
| <i>Klebsiella pneumoniae</i>  | AR0125 | CDC | > 32; R   | -0.8 | R | > 64; R  | -0.6 | R | 16; R   | -0.7 | R |
| <i>Klebsiella pneumoniae</i>  | AR0126 | CDC | ≤ 0.25; S | 3.3  | S | ≤ 0.5; S | 4.7  | S | 8; R    | 0.0  | R |
| <i>Salmonella senftenberg</i> | AR0127 | CDC | 16; R     | 0.3  | R | > 64; R  | 0.9  | R | 2; I    | 6.7  | S |
| <i>Escherichia coli</i>       | AR0128 | CDC | 32; R     | -0.6 | R | > 64; R  | 0.7  | R | 8; R    | 6.9  | S |
| <i>Klebsiella pneumoniae</i>  | AR0129 | CDC | > 32; R   | -0.1 | R | 2; S     | 5.2  | S | 8; R    | 0.5  | R |
| <i>Serratia marcescens</i>    | AR0130 | CDC | ≤ 0.25; S | 4.0  | S | 1; S     | 3.9  | S | > 32; R | 0.1  | R |

\* int = categorical interpretation

**Table B. A. baumannii strain information.**

| Species             | Strain   | Origin | Ciprofloxacin   |                  |                   | Gentamicin      |                  |                   | Imipenem        |                  |                   |
|---------------------|----------|--------|-----------------|------------------|-------------------|-----------------|------------------|-------------------|-----------------|------------------|-------------------|
|                     |          |        | BMD (MIC; int*) | qPCR assay (ΔCq) | qPCR assay (int*) | BMD (MIC; int*) | qPCR assay (ΔCq) | qPCR assay (int*) | BMD (MIC; int*) | qPCR assay (ΔCq) | qPCR assay (int*) |
| <i>A. baumannii</i> | AR0033   | CDC    | 32; R           | -0.3             | R                 | > 64; R         | -0.4             | R                 | 2; S            | 2.8              | S                 |
| <i>A. baumannii</i> | AR0035   | CDC    | 32; R           | -0.3             | R                 | 8; I            | 0.1              | R                 | > 32; R         | -0.2             | R                 |
| <i>A. baumannii</i> | AR0036   | CDC    | > 32; R         | 0.3              | R                 | 8; I            | 1.2              | R                 | 32; R           | 0.4              | R                 |
| <i>A. baumannii</i> | AR0037   | CDC    | 32; R           | -0.3             | R                 | > 64; R         | -0.3             | R                 | 2; S            | 3.6              | S                 |
| <i>A. baumannii</i> | AR0045   | CDC    | 16; R           | -0.3             | R                 | > 64; R         | 0.4              | R                 | 8; R            | -0.1             | R                 |
| <i>A. baumannii</i> | AR0052   | CDC    | 4; R            | 0.8              | R                 | > 64; R         | 0.2              | R                 | 8; R            | 0.1              | R                 |
| <i>A. baumannii</i> | AR0056   | CDC    | 32; R           | -0.7             | R                 | > 64; R         | -0.9             | R                 | 32; R           | -1.1             | R                 |
| <i>A. baumannii</i> | AR0063   | CDC    | 32; R           | -0.8             | R                 | 2; S            | 6.4              | S                 | 8; R            | 0.0              | R                 |
| <i>A. baumannii</i> | AR0070   | CDC    | 4; R            | -0.1             | R                 | 64; R           | -0.2             | R                 | 8; R            | 0.6              | R                 |
| <i>A. baumannii</i> | AR0078   | CDC    | > 32; R         | -0.1             | R                 | > 64; R         | 0.3              | R                 | 16; R           | 0.3              | R                 |
| <i>A. baumannii</i> | AR0083   | CDC    | 8; R            | -0.1             | R                 | > 64; R         | 0.2              | R                 | 32; R           | 0.0              | R                 |
| <i>A. baumannii</i> | AR0088   | CDC    | 16; R           | -0.4             | R                 | > 64; R         | 0.2              | R                 | 2; S            | 2.2              | S                 |
| <i>A. baumannii</i> | AR0101   | CDC    | 32; R           | -0.6             | R                 | 4; S            | 4.5              | S                 | > 32; R         | -0.3             | R                 |
| <i>A. baumannii</i> | AR0102   | CDC    | 16; R           | -0.4             | R                 | > 64; R         | -0.4             | R                 | 1; S            | 4.5              | S                 |
| <i>A. baumannii</i> | NR-13380 | BEI    | 16; R           | -0.3             | R                 | > 64; R         | 0.2              | R                 | 0.5; S          | 5.4              | S                 |
| <i>A. baumannii</i> | NR-13383 | BEI    | > 32; R         | -0.5             | R                 | > 64; R         | 0.1              | R                 | 4; I            | -0.8             | R                 |
| <i>A. baumannii</i> | NR-17780 | BEI    | 16; R           | 0.6              | R                 | > 64; R         | 0.5              | R                 | 0.5; S          | 6.1              | S                 |
| <i>A. baumannii</i> | NR-17781 | BEI    | 2; I            | 0.0              | R                 | > 64; R         | 0.3              | R                 | 1; S            | 5.3              | S                 |
| <i>A. baumannii</i> | NR-17782 | BEI    | 32; R           | 0.1              | R                 | > 64; R         | 0.0              | R                 | 0.5; S          | 4.9              | S                 |
| <i>A. baumannii</i> | NR-17784 | BEI    | > 32; R         | -0.5             | R                 | > 64; R         | -0.1             | R                 | 0.5; S          | 7.2              | S                 |
| <i>A. baumannii</i> | NR-13379 | BEI    | 32; R           | -0.8             | R                 | > 64; R         | 0.0              | R                 | 16; R           | -0.1             | R                 |

|                     |          |     |           |      |   |         |      |   |           |      |   |
|---------------------|----------|-----|-----------|------|---|---------|------|---|-----------|------|---|
| <i>A. baumannii</i> | NR-13378 | BEI | 16; R     | -0.3 | R | 8; I    | 1.8  | R | > 32; R   | -0.4 | R |
| <i>A. baumannii</i> | NR-17786 | BEI | 16; R     | 0.0  | R | > 64; R | -0.3 | R | 1; S      | 4.8  | S |
| <i>A. baumannii</i> | NR-17778 | BEI | ≤ 0.25; S | 1.2  | R | 1; S    | 7.0  | S | ≤ 0.25; S | 5.1  | S |
| <i>A. baumannii</i> | NR-17787 | BEI | 32; R     | -0.4 | R | > 64; R | 0.1  | R | ≤ 0.25; S | 5.7  | S |
| <i>A. baumannii</i> | NR-13375 | BEI | > 32; R   | 0.2  | R | 32; R   | 2.5  | S | 16; R     | -0.5 | R |
| <i>A. baumannii</i> | CNH111   | FDA | 32; R     | 0.4  | R | 2; S    | 4.6  | S | ≤ 0.25; S | 5.4  | S |
| <i>A. baumannii</i> | CNH151   | FDA | ≤ 0.25; S | 3.0  | S | 1; S    | 5.8  | S | ≤ 0.25; S | 5.1  | S |
| <i>A. baumannii</i> | CNH160   | FDA | ≤ 0.25; S | 3.3  | S | 4; S    | 6.7  | S | ≤ 0.25; S | 5.8  | S |
| <i>A. baumannii</i> | CNH640   | FDA | ≤ 0.25; S | 3.1  | S | 2; S    | 5.5  | S | ≤ 0.25; S | 6.0  | S |

\* int = categorical interpretation

**Table C. *P. aeruginosa* strain information.**

| Species              | Strain   | Origin   | Ciprofloxacin   |                  |                   | Gentamicin      |                  |                   | Imipenem        |                  |                   |
|----------------------|----------|----------|-----------------|------------------|-------------------|-----------------|------------------|-------------------|-----------------|------------------|-------------------|
|                      |          |          | BMD (MIC; int*) | qPCR assay (ΔCq) | qPCR assay (int*) | BMD (MIC; int*) | qPCR assay (ΔCq) | qPCR assay (int*) | BMD (MIC; int*) | qPCR assay (ΔCq) | qPCR assay (int*) |
| <i>P. aeruginosa</i> | AR0054   | CDC      | 8; R            | -0.1             | R                 | > 64; R         | -0.4             | R                 | > 32; R         | 0.4              | R                 |
| <i>P. aeruginosa</i> | AR0064   | CDC      | 8; R            | 0.3              | R                 | 1; S            | 4.2              | S                 | > 32; R         | 0.1              | R                 |
| <i>P. aeruginosa</i> | AR0090   | CDC      | 16; R           | -0.5             | R                 | > 64; R         | 0.3              | R                 | > 32; R         | 0.3              | R                 |
| <i>P. aeruginosa</i> | AR0092   | CDC      | 32; R           | -1.5             | R                 | > 64; R         | -0.5             | R                 | > 32; R         | -0.1             | R                 |
| <i>P. aeruginosa</i> | AR0094   | CDC      | 16; R           | -0.7             | R                 | 16; R           | 0.1              | R                 | 32; R           | 0.2              | R                 |
| <i>P. aeruginosa</i> | AR0095   | CDC      | 16; R           | 0.0              | R                 | 0.5; S          | 4.0              | S                 | 16; R           | 0.8              | R                 |
| <i>P. aeruginosa</i> | AR0100   | CDC      | 16; R           | 0.0              | R                 | > 64; R         | -0.2             | R                 | 32; R           | -0.8             | R                 |
| <i>P. aeruginosa</i> | AR0103   | CDC      | 16; R           | -0.3             | R                 | > 64; R         | -1.3             | R                 | > 32; R         | -0.2             | R                 |
| <i>P. aeruginosa</i> | AR0105   | CDC      | > 32; R         | -0.4             | R                 | > 64; R         | 0.1              | R                 | 1; S            | 3.7              | S                 |
| <i>P. aeruginosa</i> | AR0108   | CDC      | 16; R           | -0.4             | R                 | > 64; R         | -0.3             | R                 | > 32; R         | 0.4              | R                 |
| <i>P. aeruginosa</i> | AR0110   | CDC      | 16; R           | 0.6              | R                 | > 64; R         | 0.5              | R                 | > 32; R         | 0.7              | R                 |
| <i>P. aeruginosa</i> | AR0111   | CDC      | 8; R            | -0.6             | R                 | > 64; R         | -0.1             | R                 | > 32; R         | 0.0              | R                 |
| <i>P. aeruginosa</i> | 105898   | USAMRIID | 8; R            | 0.1              | R                 | > 64; R         | 0.3              | R                 | 0.5; S          | 2.6              | S                 |
| <i>P. aeruginosa</i> | 105819   | USAMRIID | 4; R            | 0.4              | R                 | > 64; R         | 0.5              | R                 | 8; R            | -0.1             | R                 |
| <i>P. aeruginosa</i> | CNH770   | FDA      | ≤ 0.25; S       | 2.4              | S                 | ≤ 0.5; S        | 4.2              | S                 | 1; S            | 4.1              | S                 |
| <i>P. aeruginosa</i> | 105756   | USAMRIID | 4; R            | 0.0              | R                 | > 64; R         | 0.3              | R                 | 4; I            | 1.6              | R                 |
| <i>P. aeruginosa</i> | 105857   | USAMRIID | 16; R           | -0.2             | R                 | 32; R           | 2.0              | S                 | > 32; R         | -0.2             | R                 |
| <i>P. aeruginosa</i> | 000006   | USAMRIID | 32; R           | -0.6             | R                 | 16; R           | 1.1              | R                 | 1; S            | 2.1              | S                 |
| <i>P. aeruginosa</i> | CNH363   | FDA      | ≤ 0.25; S       | 3.1              | S                 | ≤ 0.5; S        | 6.0              | S                 | 1; S            | 5.7              | S                 |
| <i>P. aeruginosa</i> | NR-31041 | BEI      | ≤ 0.25; S       | 2.8              | S                 | 64; R           | -0.6             | R                 | 2; S            | 2.3              | S                 |
| <i>P. aeruginosa</i> | NR-50573 | BEI      | ≤ 0.25; S       | 2.0              | S                 | ≤ 0.5; S        | 4.6              | S                 | 0.5; S          | 5.4              | S                 |
| <i>P. aeruginosa</i> | NR-48928 | BEI      | ≤ 0.25; S       | 1.8              | S                 | > 64; R         | 0.2              | R                 | 1; S            | 3.1              | S                 |

\* int = categorical interpretation

**Table D. *E. faecium* strain information.**

| Species           | Strain   | Origin   | Ciprofloxacin   |                           |                   | Vancomycin      |                           |                   | Ampicillin      |                           |                   |
|-------------------|----------|----------|-----------------|---------------------------|-------------------|-----------------|---------------------------|-------------------|-----------------|---------------------------|-------------------|
|                   |          |          | BMD (MIC; int*) | qPCR assay ( $\Delta$ Cq) | qPCR assay (int*) | BMD (MIC; int*) | qPCR assay ( $\Delta$ Cq) | qPCR assay (int*) | BMD (MIC; int*) | qPCR assay ( $\Delta$ Cq) | qPCR assay (int*) |
| <i>E. faecium</i> | NR-32065 | BEI      | 4; R            | 0.9                       | R                 | > 32; R         | 0.1                       | R                 | 4; S            | 2.1                       | S                 |
| <i>E. faecium</i> | NR-32094 | BEI      | > 32; R         | 0.2                       | R                 | 32; R           | 0.3                       | R                 | 32; R           | 0.0                       | R                 |
| <i>E. faecium</i> | HM-463   | BEI      | 32; R           | -0.5                      | R                 | 0.5; S          | 2.4                       | S                 | 16; R           | 0.7                       | R                 |
| <i>E. faecium</i> | NR-32053 | BEI      | $\leq$ 0.25; S  | 2.7                       | S                 | > 32; R         | 1.5                       | R                 | 2; S            | 3.3                       | S                 |
| <i>E. faecium</i> | NR-31967 | BEI      | 8; R            | -0.1                      | R                 | 1; S            | 5.2                       | S                 | > 64; R         | 0.6                       | R                 |
| <i>E. faecium</i> | NR-31916 | BEI      | 1; S            | 1.6                       | S                 | > 32; R         | 2.6                       | S                 | 8; S            | 2.8                       | S                 |
| <i>E. faecium</i> | NR-31937 | BEI      | 2; I            | 1.5                       | R                 | 0.5; S          | 0.9                       | R                 | $\leq$ 0.5; S   | 1.7                       | S                 |
| <i>E. faecium</i> | NR-28979 | BEI      | 2; I            | 0.2                       | R                 | 1; S            | 3.1                       | S                 | 64; R           | -0.5                      | R                 |
| <i>E. faecium</i> | NR-28982 | BEI      | > 32; R         | -0.7                      | R                 | 1; S            | 3.8                       | S                 | 64; R           | 0.2                       | R                 |
| <i>E. faecium</i> | HM-204   | BEI      | 1; S            | 1.2                       | R                 | 1; S            | 4.8                       | S                 | 2; S            | 3.9                       | S                 |
| <i>E. faecium</i> | NR-31963 | BEI      | 4; R            | 0.9                       | R                 | 1; S            | 4.8                       | S                 | 16; R           | -0.5                      | R                 |
| <i>E. faecium</i> | NR-31954 | BEI      | 16; R           | 2.2                       | S                 | 1; S            | 3.4                       | S                 | 2; S            | 4.2                       | S                 |
| <i>E. faecium</i> | NR-28976 | BEI      | $\leq$ 0.25; S  | 2.4                       | S                 | 1; S            | 4.1                       | S                 | 2; S            | 4.8                       | S                 |
| <i>E. faecium</i> | NR-31955 | BEI      | > 32; R         | -1.1                      | R                 | 0.5; S          | 4.5                       | S                 | 32; R           | 0.1                       | R                 |
| <i>E. faecium</i> | NR-31912 | BEI      | 32; R           | -0.2                      | R                 | > 32; R         | 1.2                       | R                 | 32; R           | -0.4                      | R                 |
| <i>E. faecium</i> | NR-31913 | BEI      | 1; S            | 2.1                       | S                 | 0.5; S          | 11.4                      | S                 | 8; S            | 4.6                       | S                 |
| <i>E. faecium</i> | NR-32052 | BEI      | 0.5; S          | 1.6                       | S                 | > 32; R         | 0.8                       | R                 | 4; S            | 1.6                       | S                 |
| <i>E. faecium</i> | NR-32054 | BEI      | 1; S            | 2.4                       | S                 | > 32; R         | 1.0                       | R                 | 4; S            | 3.6                       | S                 |
| <i>E. faecium</i> | GRIM718  | USAMRIID | > 32; R         | -0.5                      | R                 | > 32; R         | 2.8                       | S                 | 64; R           | 0.6                       | R                 |
| <i>E. faecium</i> | GRIM725  | USAMRIID | 2; I            | 0.8                       | R                 | 1; S            | 3.9                       | S                 | > 64; R         | -0.8                      | R                 |
| <i>E. faecium</i> | GRIM726  | USAMRIID | > 32; R         | -0.2                      | R                 | 1; S            | 4.3                       | S                 | 64; R           | 0.5                       | R                 |
| <i>E. faecium</i> | 10857    | USAMRIID | > 32; R         | -0.4                      | R                 | 1; S            | 3.8                       | S                 | 64; R           | 0.1                       | R                 |

\* int = categorical interpretation

**Table E. *S. aureus* strain information.**

| Species          | Strain      | Origin   | Ciprofloxacin   |                           |                   | Vancomycin      |                           |                   | Oxacillin       |                           |                   |
|------------------|-------------|----------|-----------------|---------------------------|-------------------|-----------------|---------------------------|-------------------|-----------------|---------------------------|-------------------|
|                  |             |          | BMD (MIC; int*) | qPCR assay ( $\Delta$ Cq) | qPCR assay (int*) | BMD (MIC; int*) | qPCR assay ( $\Delta$ Cq) | qPCR assay (int*) | BMD (MIC; int*) | qPCR assay ( $\Delta$ Cq) | qPCR assay (int*) |
| <i>S. aureus</i> | ATCC BAA-38 | ATCC     | $\leq$ 0.25; S  | 3.3                       | S                 | 1; S            | 3.7                       | S                 | 32; R           | 0.1                       | R                 |
| <i>S. aureus</i> | ATCC BAA-39 | ATCC     | 4; R            | 0.7                       | R                 | 2; S            | 4.9                       | S                 | 32; R           | 0                         | R                 |
| <i>S. aureus</i> | ATCC BAA-40 | ATCC     | $\leq$ 0.25; S  | 2.9                       | S                 | 2; S            | 5                         | S                 | > 32; R         | -0.3                      | R                 |
| <i>S. aureus</i> | ATCC BAA-41 | ATCC     | 8; R            | 0.4                       | R                 | 2; S            | 5.7                       | S                 | > 32; R         | 1.7                       | R                 |
| <i>S. aureus</i> | ATCC BAA-43 | ATCC     | 32; R           | 0.4                       | R                 | 1; S            | 4.4                       | S                 | > 32; R         | 0.2                       | R                 |
| <i>S. aureus</i> | ATCC BAA-44 | ATCC     | 4; R            | 0.7                       | R                 | 2; S            | 3.1                       | S                 | > 32; R         | 0.7                       | R                 |
| <i>S. aureus</i> | GRIM48      | USAMRIID | $\leq$ 0.25; S  | 3.3                       | S                 | 1; S            | 3.5                       | S                 | $\leq$ 0.25; S  | 3.3                       | S                 |

|                  |               |      |           |      |   |         |      |   |           |      |   |
|------------------|---------------|------|-----------|------|---|---------|------|---|-----------|------|---|
| <i>S. aureus</i> | FDAARGOS_159  | FDA  | ≤ 0.25; S | 3.7  | S | 2; S    | 4.9  | S | ≤ 0.25; S | 4.1  | S |
| <i>S. aureus</i> | FDAARGOS_169  | FDA  | 1; S      | 3.8  | S | 1; S    | 4.4  | S | 16; R     | -0.1 | R |
| <i>S. aureus</i> | ATCC 700698   | ATCC | 32; R     | -0.1 | R | 2; S    | 2.4  | S | > 32; R   | -0.6 | R |
| <i>S. aureus</i> | FDAARGOS_135  | FDA  | 4; R      | 0.8  | R | 1; S    | 5.2  | S | 8; R      | 3.3  | S |
| <i>S. aureus</i> | FDAARGOS_140  | FDA  | 4; R      | 0.4  | R | 1; S    | 5.9  | S | 8; R      | 0.6  | R |
| <i>S. aureus</i> | 71080         | BEI  | 32; R     | 1.3  | R | > 32; R | 0.3  | R | > 32; R   | 0.7  | R |
| <i>S. aureus</i> | ATCC 25923    | ATCC | ≤ 0.25; S | 5.8  | S | 2; S    | 4.8  | S | ≤ 0.25; S | 4    | S |
| <i>S. aureus</i> | ATCC 29213    | ATCC | ≤ 0.25; S | 4.3  | S | 1; S    | 6    | S | ≤ 0.25; S | 3.7  | S |
| <i>S. aureus</i> | ATCC 12600    | ATCC | ≤ 0.25; S | 5.1  | S | 1; S    | 5.9  | S | ≤ 0.25; S | 2.7  | S |
| <i>S. aureus</i> | ATCC 13565    | ATCC | ≤ 0.25; S | 4.9  | S | 1; S    | 4.8  | S | ≤ 0.25; S | 4.1  | S |
| <i>S. aureus</i> | ATCC 14458    | ATCC | ≤ 0.25; S | 3.2  | S | 1; S    | 5.2  | S | 0.5; S    | 1.7  | R |
| <i>S. aureus</i> | ATCC 8095     | ATCC | ≤ 0.25; S | 4.2  | S | 1; S    | 6.6  | S | ≤ 0.25; S | 5.6  | S |
| <i>S. aureus</i> | 880 (BR-VRSA) | BEI  | 16; R     | 0.1  | R | 16; R   | -0.8 | R | > 32; R   | -0.1 | R |

\* int = categorical interpretation

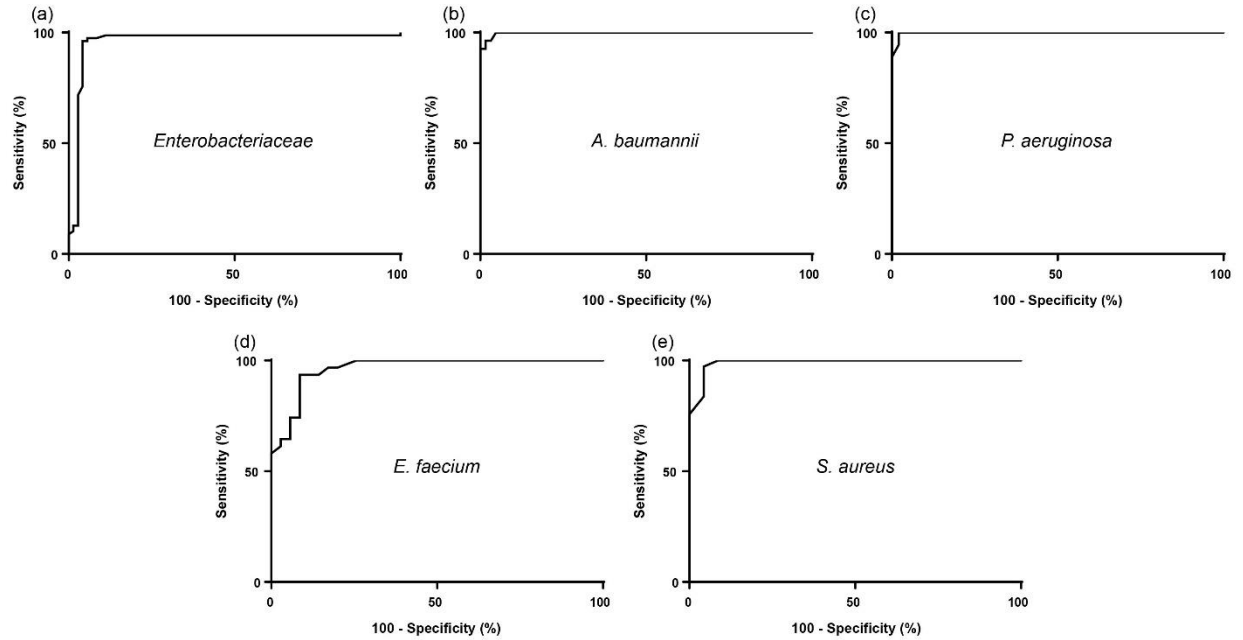

**Figure A.** ROC curves derived from the experimental  $\Delta Cq$  values. ROC curves were generated such that resistance was considered the “control”. Sensitivity is then defined as the ability of the assay to call true susceptibility and is a measure of the major error rate. Specificity is defined as the ability of the assay to call true resistance and is a measure of the very major error rate. Cutoff values were selected to maximize the likelihood ratio for a correct susceptibility call. (a) *Enterobacteriaceae*, (b) *A. baumannii*, (c) *P. aeruginosa*, (d) *E. faecium*, (e) *S. aureus*.

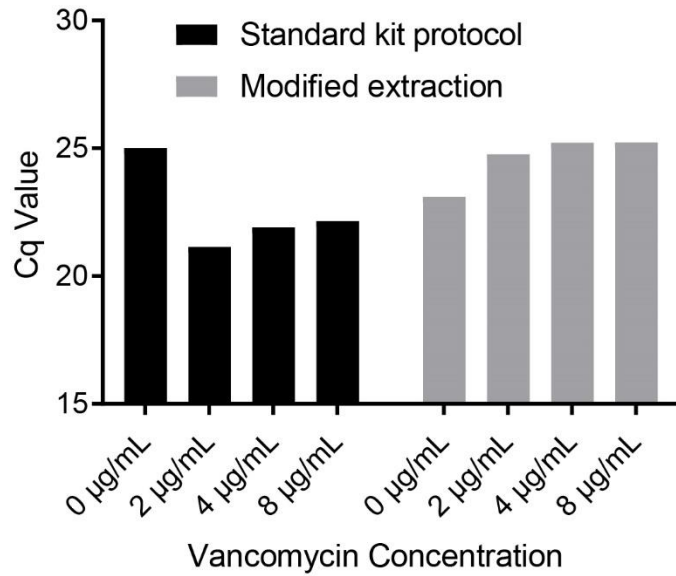

**Figure B.** Example of insufficient bacterial lysis. The RAMAST assay was performed on cultures of *S. aureus* ATCC 25923, utilizing two different DNA extraction methods. For the standard kit protocol, DNA was extracted using an automated EZ1 instrument (Qiagen, Hilden, Germany) following the manufacturer's protocol with a DNA tissue kit and a DNA bacteria card. The modified extraction protocol is described in the materials and methods. Using the standard kit protocol resulted in inconsistent lysis / extraction for high loads of Gram positive bacteria, a situation that is often the case for no-antibiotic samples and for resistant strains.

**Table F. Retesting of strain-antibiotic combinations originally resulting in errors.**

| Species              | Strain       | Antibiotic    | BMD<br>(MIC; int*) | qPCR<br>assay<br>( $\Delta$ Cq) | qPCR<br>assay<br>(int*) |
|----------------------|--------------|---------------|--------------------|---------------------------------|-------------------------|
| <i>E. coli</i>       | AR0017       | Gentamicin    | 1; S               | 1.5                             | R                       |
| <i>P. stuartii</i>   | AR0026       | Imipenem      | 0.5; S             | -0.8                            | R                       |
| <i>S. marcescens</i> | AR0027       | Ciprofloxacin | $\leq$ 0.25; S     | 1.5                             | R                       |
| <i>E. coli</i>       | AR0128       | Imipenem      | 8; R               | 5.6                             | S                       |
| <i>A. baumannii</i>  | NR-17778     | Ciprofloxacin | $\leq$ 0.25; S     | -1.7                            | R                       |
| <i>A. baumannii</i>  | NR-13375     | Gentamicin    | 32; R              | -0.1                            | R                       |
| <i>P. aeruginosa</i> | 105857       | Gentamicin    | 32; R              | 0.3                             | R                       |
| <i>E. faecium</i>    | NR-31916     | Vancomycin    | > 32; R            | 5.4                             | S                       |
| <i>E. faecium</i>    | NR-31937     | Vancomycin    | 0.5; S             | 2.7                             | S                       |
| <i>E. faecium</i>    | HM-204       | Ciprofloxacin | 1; S               | 3.5                             | S                       |
| <i>E. faecium</i>    | NR-31954     | Ciprofloxacin | 16; R              | 2                               | S                       |
| <i>E. faecium</i>    | GRIM718      | Vancomycin    | > 32; R            | 2.6                             | S                       |
| <i>S. aureus</i>     | ATCC 14458   | Oxacillin     | 0.5; S             | 0.6                             | R                       |
| <i>S. aureus</i>     | FDAARGOS_135 | Oxacillin     | 8; R               | -1.2                            | R                       |

\* int = categorical interpretation



**Table G. Categorical agreement and errors for each strain and antibiotic.**

|                           | Isolates resistant by BMD |                 | Isolates susceptible by BMD |                 | Isolates intermediate by BMD |                 | Total replicates | Very major error rate | Major error rate | Number of minor errors | Categorical agreement |
|---------------------------|---------------------------|-----------------|-----------------------------|-----------------|------------------------------|-----------------|------------------|-----------------------|------------------|------------------------|-----------------------|
|                           | Susceptible by BQ         | Resistant by BQ | Susceptible by BQ           | Resistant by BQ | Susceptible by BQ            | Resistant by BQ |                  |                       |                  |                        |                       |
| <i>Enterobacteriaceae</i> |                           |                 |                             |                 |                              |                 |                  |                       |                  |                        |                       |
| Ciprofloxacin             | 0                         | 27              | 22                          | 1               | 0                            | 0               | 50               | 0.0%                  | 4.3%             | 0                      | 98.0%                 |
| Gentamicin                | 0                         | 17              | 30                          | 1               | 1                            | 1               | 50               | 0.0%                  | 3.2%             | 1                      | 96.0%                 |
| Imipenem                  | 1                         | 24              | 23                          | 1               | 1                            | 0               | 50               | 4.0%                  | 4.2%             | 1                      | 94.0%                 |
| Overall                   | 1                         | 68              | 75                          | 3               | 2                            | 1               | 150              | 1.4%                  | 3.8%             | 2                      | 96.0%                 |
| <i>A. baumannii</i>       |                           |                 |                             |                 |                              |                 |                  |                       |                  |                        |                       |
| Ciprofloxacin             | 0                         | 25              | 3                           | 1               | 0                            | 1               | 30               | 0.0%                  | 25.0%            | 0                      | 96.7%                 |
| Gentamicin                | 1                         | 19              | 7                           | 0               | 0                            | 3               | 30               | 5.0%                  | 0.0%             | 0                      | 96.7%                 |
| Imipenem                  | 0                         | 13              | 16                          | 0               | 0                            | 1               | 30               | 0.0%                  | 0.0%             | 0                      | 100.0%                |
| Overall                   | 1                         | 57              | 26                          | 1               | 0                            | 5               | 90               | 1.7%                  | 3.7%             | 0                      | 97.8%                 |
| <i>P. aeruginosa</i>      |                           |                 |                             |                 |                              |                 |                  |                       |                  |                        |                       |
| Ciprofloxacin             | 0                         | 17              | 5                           | 0               | 0                            | 0               | 22               | 0.0%                  | 0.0%             | 0                      | 100.0%                |
| Gentamicin                | 1                         | 16              | 5                           | 0               | 0                            | 0               | 22               | 5.9%                  | 0.0%             | 0                      | 95.5%                 |
| Imipenem                  | 0                         | 13              | 8                           | 0               | 0                            | 1               | 22               | 0.0%                  | 0.0%             | 0                      | 100.0%                |
| Overall                   | 1                         | 46              | 18                          | 0               | 0                            | 1               | 66               | 2.1%                  | 0.0%             | 0                      | 98.5%                 |
| <i>E. faecium</i>         |                           |                 |                             |                 |                              |                 |                  |                       |                  |                        |                       |
| Ciprofloxacin             | 1                         | 11              | 6                           | 1               | 0                            | 3               | 22               | 8.3%                  | 14.3%            | 0                      | 90.9%                 |
| Vancomycin                | 2                         | 6               | 13                          | 1               | 0                            | 0               | 22               | 25.0%                 | 7.1%             | 0                      | 86.4%                 |
| Ampicillin                | 0                         | 12              | 10                          | 0               | 0                            | 0               | 22               | 0.0%                  | 0.0%             | 0                      | 100.0%                |
| Overall                   | 3                         | 29              | 29                          | 2               | 0                            | 3               | 66               | 9.4%                  | 6.5%             | 0                      | 92.4%                 |
| <i>S. aureus</i>          |                           |                 |                             |                 |                              |                 |                  |                       |                  |                        |                       |
| Ciprofloxacin             | 0                         | 9               | 11                          | 0               | 0                            | 0               | 20               | 0.0%                  | 0.0%             | 0                      | 100.0%                |
| Vancomycin                | 0                         | 2               | 18                          | 0               | 0                            | 0               | 20               | 0.0%                  | 0.0%             | 0                      | 100.0%                |
| Oxacillin                 | 1                         | 11              | 7                           | 1               | 0                            | 0               | 20               | 8.3%                  | 12.5%            | 0                      | 90.0%                 |
| Overall                   | 1                         | 22              | 36                          | 1               | 0                            | 0               | 60               | 4.3%                  | 2.7%             | 0                      | 96.7%                 |

**Table H. Vancomycin concentration optimization for *E. faecium***

| Species           | Strain   | Vancomycin |                    |                   |                 |                 |                 |                 |
|-------------------|----------|------------|--------------------|-------------------|-----------------|-----------------|-----------------|-----------------|
|                   |          | BMD        | qPCR<br>0.25 µg/mL | qPCR<br>0.5 µg/mL | qPCR<br>1 µg/mL | qPCR<br>2 µg/mL | qPCR<br>4 µg/mL | qPCR<br>8 µg/mL |
| <i>E. faecium</i> | NR-32065 | > 32; R    | R                  | R                 | R               | R               | S               | S               |
| <i>E. faecium</i> | NR-32094 | 32; R      | R                  | R                 | R               | R               | R               | R               |
| <i>E. faecium</i> | HM-463   | 0.5; S     | R                  | S                 | S               | S               | S               | S               |
| <i>E. faecium</i> | NR-32053 | > 32; R    | R                  | R                 | R               | R               | S               | S               |
| <i>E. faecium</i> | NR-31967 | 1; S       | R                  | R                 | S               | S               | S               | S               |
| <i>E. faecium</i> | NR-31916 | > 32; R    | R                  | R                 | S               | S               | S               | S               |
| <i>E. faecium</i> | NR-31937 | 0.5; S     | R                  | R                 | R               | R               | S               | S               |
| <i>E. faecium</i> | NR-28979 | 1; S       | R                  | R                 | S               | S               | S               | S               |
| <i>E. faecium</i> | NR-28982 | 1; S       | R                  | R                 | S               | S               | S               | S               |
| <i>E. faecium</i> | HM-204   | 1; S       | R                  | R                 | S               | S               | S               | S               |
| <i>E. faecium</i> | NR-31963 | 1; S       | R                  | R                 | S               | S               | S               | S               |
| <i>E. faecium</i> | NR-31954 | 1; S       | R                  | R                 | S               | S               | S               | S               |
| <i>E. faecium</i> | NR-28976 | 1; S       | R                  | S                 | S               | S               | S               | S               |
| <i>E. faecium</i> | NR-31955 | 0.5; S     | R                  | S                 | S               | S               | S               | S               |
| <i>E. faecium</i> | NR-31912 | > 32; R    | R                  | R                 | R               | R               | S               | S               |
| <i>E. faecium</i> | NR-31913 | 0.5; S     | R                  | S                 | S               | S               | S               | S               |
| <i>E. faecium</i> | NR-32052 | > 32; R    | R                  | R                 | R               | R               | R               | S               |
| <i>E. faecium</i> | NR-32054 | > 32; R    | R                  | S                 | R               | S               | S               | S               |
| <i>E. faecium</i> | GRIM718  | > 32; R    | R                  | R                 | S               | S               | S               | S               |
| <i>E. faecium</i> | GRIM725  | 1; S       | R                  | S                 | S               | S               | S               | S               |
| <i>E. faecium</i> | GRIM726  | 1; S       | R                  | S                 | S               | S               | S               | S               |
| <i>E. faecium</i> | 10857    | 1; S       | R                  | S                 | S               | S               | S               | S               |
